# Supplementary material
Source: publisher site journal article supplement (https://www.spandidos-publications.com/3997/downloadSupplementary)
Supplement: Supplementary file 2 [file downloadSupplementary]

## Sheet: Sup Table1
Table SII. Samples in patient and control groups.
ID_REF	!Sample_description	!Sample_characteristics_ch1
GSM1167073	patient group	disease status: patient without recurrent events
GSM1167074	patient group	disease status: patient without recurrent events
GSM1167075	patient group	disease status: patient without recurrent events
GSM1167076	patient group	disease status: patient without recurrent events
GSM1167077	patient group	disease status: patient without recurrent events
GSM1167079	patient group	disease status: patient without recurrent events
GSM1167080	patient group	disease status: patient without recurrent events
GSM1167082	patient group	disease status: patient without recurrent events
GSM1167083	patient group	disease status: patient without recurrent events
GSM1167084	patient group	disease status: patient without recurrent events
GSM1167085	patient group	disease status: patient without recurrent events
GSM1167086	patient group	disease status: patient without recurrent events
GSM1167087	patient group	disease status: patient without recurrent events
GSM1167089	patient group	disease status: patient without recurrent events
GSM1167090	patient group	disease status: patient without recurrent events
GSM1167091	patient group	disease status: patient without recurrent events
GSM1167092	patient group	disease status: patient without recurrent events
GSM1167093	patient group	disease status: patient without recurrent events
GSM1167094	patient group	disease status: patient without recurrent events
GSM1167095	patient group	disease status: patient without recurrent events
GSM1167096	patient group	disease status: patient without recurrent events
GSM1167098	patient group	disease status: patient without recurrent events
GSM1167099	patient group	disease status: patient without recurrent events
GSM1167100	patient group	disease status: patient without recurrent events
GSM1167101	patient group	disease status: patient without recurrent events
GSM1167102	normal control group	disease status: normal control
GSM1167103	normal control group	disease status: normal control
GSM1167104	normal control group	disease status: normal control
GSM1167105	normal control group	disease status: normal control
GSM1167106	normal control group	disease status: normal control
GSM1167107	normal control group	disease status: normal control
GSM1167108	normal control group	disease status: normal control
GSM1167109	normal control group	disease status: normal control
GSM1167110	normal control group	disease status: normal control
GSM1167111	normal control group	disease status: normal control
GSM1167112	normal control group	disease status: normal control
GSM1167113	normal control group	disease status: normal control
GSM1167114	normal control group	disease status: normal control
GSM1167115	normal control group	disease status: normal control
GSM1167116	normal control group	disease status: normal control
GSM1167117	normal control group	disease status: normal control
GSM1167118	normal control group	disease status: normal control
GSM1167119	normal control group	disease status: normal control
GSM1167120	normal control group	disease status: normal control
GSM1167121	normal control group	disease status: normal control
GSM1167122	patient group	disease status: patient without recurrent events
GSM1167123	normal control group	disease status: normal control
